# Supplementary material for: Three novel 3D (3,8)-connected metal–organic frameworks constructed from flexible-rigid mixed ligands
Source: Royal Society of Chemistry journal article supplement (doi:10.1039/b904000e), 2009-01-01
Supplement: b904000e.pdf [file b904000e.pdf]

## Electronic Supplementary Information

### Three Novel 3D (3,8)-connected Metal-Organic Frameworks Constructed from Flexible-Rigid Mixed Ligands

Guang-Juan Xu, Ya-Hui Zhao, Kui-Zhan Shao, Ya-Qian Lan, Xin-Long Wang,  
Zhong-Min Su\*, Li-Kai Yan

*Institute of Functional Material Chemistry, Faculty of Chemistry, Northeast Normal  
University, Changchun 130024, P. R. China*

\* Corresponding author.

E-mail: [zmsu@nenu.edu.cn](mailto:zmsu@nenu.edu.cn)

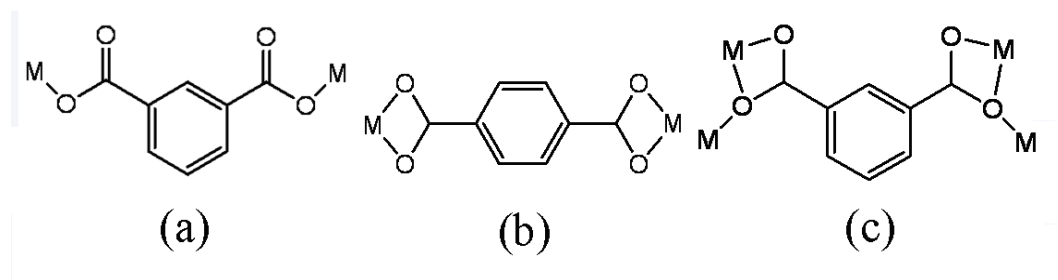

**Scheme S1.** Coordination modes of the organic ligands: (a) 1,3-bdc for complex **1**, (b) 1,4-bdc for complex **2**, (c) 1,3-bdc for complex **3**.

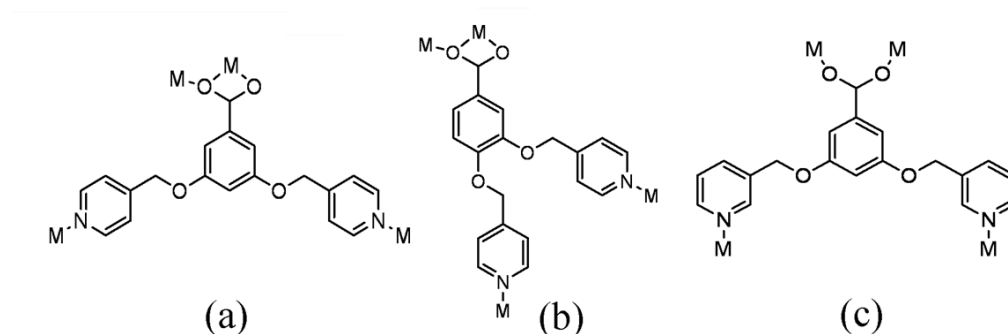

**Scheme S2.** Coordination modes of the organic ligands: (a) L1 for complex **1**, (b) L2 for complex **2**, (c) L3 for complex **3**.

**Table S1** Selected bond lengths (Å) and angles (°) for complexes **1**, **2** and **3**<sup>a</sup>

| Complex 1           |          |                     |           |
|---------------------|----------|---------------------|-----------|
| Cd(1)-O(5)          | 2.193(4) | Cd(1)-O(2)#2        | 2.359(3)  |
| Cd(1)-N(1)#1        | 2.303(3) | Cd(1)-O(1)#2        | 2.450(3)  |
| Cd(1)-N(2)          | 2.366(4) | Cd(1)-O(1)#3        | 2.463(3)  |
| O(5)-Cd(1)-N(1)#1   | 114.7(2) | O(5)-Cd(1)-O(1)#3   | 148.2(1)  |
| O(5)-Cd(1)-O(2)#2   | 113.1(1) | O(2)#2-Cd(1)-O(1)#2 | 54.67(8)  |
| N(1)#1-Cd(1)-O(2)#2 | 87.2(1)  | N(2)-Cd(1)-O(1)#2   | 114.87(9) |
| O(5)-Cd(1)-N(2)     | 83.3(1)  | N(1)#1-Cd(1)-O(1)#3 | 92.9(1)   |
| N(1)#1-Cd(1)-N(2)   | 97.7(1)  | O(2)#2-Cd(1)-O(1)#3 | 82.4(1)   |
| O(2)#2-Cd(1)-N(2)   | 159.3(1) | N(2)-Cd(1)-O(1)#3   | 77.3(1)   |
| O(5)-Cd(1)-O(1)#2   | 91.6(1)  | O(1)#2-Cd(1)-O(1)#3 | 74.5(1)   |
| N(1)#1-Cd(1)-O(1)#2 | 140.6(1) |                     |           |
| Complex 2           |          |                     |           |
| Cd(1)-N(1)          | 2.328(7) | Cd(1)-O(2)#1        | 2.464(6)  |
| Cd(1)-O(5)          | 2.341(7) | Cd(1)-O(6)          | 2.456(7)  |
| Cd(1)-O(1)#1        | 2.359(6) | Cd(1)-O(2)#3        | 2.486(6)  |
| Cd(1)-N(2)#2        | 2.390(7) |                     |           |
| N(1)-Cd(1)-O(5)     | 87.7(3)  | O(5)-Cd(1)-O(6)     | 52.6(3)   |
| N(1)-Cd(1)-O(1)#1   | 143.5(2) | O(1)#1-Cd(1)-O(6)   | 84.6(3)   |
| O(5)-Cd(1)-O(1)#1   | 123.1(3) | N(2)#2-Cd(1)-O(6)   | 113.0(3)  |
| N(1)-Cd(1)-N(2)#2   | 85.7(2)  | O(2)#1-Cd(1)-O(6)   | 122.6(3)  |
| O(5)-Cd(1)-N(2)#2   | 84.0(3)  | N(1)-Cd(1)-O(2)#3   | 85.2(2)   |
| O(1)#1-Cd(1)-N(2)#2 | 79.4(2)  | O(5)-Cd(1)-O(2)#3   | 104.2(2)  |
| N(1)-Cd(1)-O(2)#1   | 95.9(2)  | O(1)#1-Cd(1)-O(2)#3 | 103.2(2)  |
| O(5)-Cd(1)-O(2)#1   | 176.0(3) | N(2)#2-Cd(1)-O(2)#3 | 167.4(2)  |
| O(1)#1-Cd(1)-O(2)#1 | 54.3(2)  | O(2)#1-Cd(1)-O(2)#3 | 74.2(2)   |
| N(2)#2-Cd(1)-O(2)#1 | 98.2(2)  | O(6)-Cd(1)-O(2)#3   | 79.6(3)   |
| N(1)-Cd(1)-O(6)     | 131.9(3) |                     |           |

---

Complex 3

|                     |          |                     |          |
|---------------------|----------|---------------------|----------|
| Cd(1)-O(1)          | 2.210(5) | Cd(1)-O(8)#2        | 2.297(5) |
| Cd(1)-O(6)          | 2.286(4) | Cd(2)-O(2)          | 2.239(5) |
| Cd(2)-O(6)          | 2.341(5) | Cd(2)-O(8)#2        | 2.485(6) |
| Cd(2)-O(7)#2        | 2.372(5) | Cd(2)-O(5)          | 2.557(5) |
| Cd(2)-N(1)#4        | 2.313(6) | Cd(2)-N(2)          | 2.358(5) |
| O(1)#1-Cd(1)-O(1)   | 166.0(3) | O(6)-Cd(1)-O(8)#2   | 78.4(2)  |
| O(1)#1-Cd(1)-O(6)   | 85.3(2)  | O(1)#1-Cd(1)-O(8)#2 | 90.5(2)  |
| O(1)-Cd(1)-O(6)     | 86.7(2)  | O(1)-Cd(1)-O(8)#2   | 99.0(2)  |
| O(6)-Cd(1)-O(6)#1   | 109.4(2) | O(6)#1-Cd(1)-O(8)#2 | 171.4(2) |
| O(8)#2-Cd(1)-O(8)#3 | 94.1(3)  | O(2)-Cd(2)-O(6)     | 92.7(2)  |
| N(1)#4-Cd(2)-O(6)   | 147.7(2) | N(1)#4-Cd(2)-O(8)#2 | 137.6(2) |
| O(2)-Cd(2)-N(2)     | 172.3(2) | O(6)-Cd(2)-O(8)#2   | 73.7(2)  |
| N(1)#4-Cd(2)-N(2)   | 90.8(2)  | N(2)-Cd(2)-O(8)#2   | 88.4(2)  |
| O(6)-Cd(2)-N(2)     | 80.7(2)  | O(7)#2-Cd(2)-O(8)#2 | 53.5(2)  |
| O(2)-Cd(2)-O(7)#2   | 92.2(2)  | O(2)-Cd(2)-O(5)     | 90.0(2)  |
| N(1)#4-Cd(2)-O(7)#2 | 84.4(2)  | N(1)#4-Cd(2)-O(5)   | 95.1(2)  |
| O(6)-Cd(2)-O(7)#2   | 127.1(2) | O(6)-Cd(2)-O(5)     | 53.1(2)  |
| N(2)-Cd(2)-O(7)#2   | 95.1(2)  | N(2)-Cd(2)-O(5)     | 82.8(2)  |
| O(2)-Cd(2)-O(8)#2   | 93.7(2)  | O(7)#2-Cd(2)-O(5)   | 177.8(2) |
| O(2)-Cd(2)-N(1)#4   | 92.6(2)  | O(8)#2-Cd(2)-O(5)   | 126.7(2) |

---

"Symmetry transformations used to generate equivalent atoms: for **1**: #1  $-x+3/2, y+1, -z+1/2$ ; #2  $-x+3/2, y+1, -z+3/2$ ; #3  $x, y+1, z$ ; for **2**: #1  $x-1, y, z-1$ ; #2  $x-1, y-1, z-1$ , #3  $-x+1, -y+1, -z+2$ ; for **3**: #1  $-x+1, y, -z+1/2$ ; #2  $x, y-1, z$ ; #3  $-x+1, y-1, -z+1/2$ ; #4  $x+1/2, -y+1/2, z+1/2$ .

### Synthesis of 3,5-bis(pyridin-4-ylmethoxy)benzoic acid (L1)

A mixture of methyl 3,5-dihydroxybenzoate (20 mmol, 3.64 g) and NaOH (40 mmol, 1.60 g) in DMF (50 ml) was stirred at 5 °C for 2 h, then 4-(chloromethyl)pyridine (40 mmol, 6.50 g) was added. The mixture was cooled to room temperature after stirring

at 70 °C for 10 h, and then poured into 200 ml of water. A light yellow solid of methyl 3,5-bis(pyridin-4-ylmethoxy)benzoate was deposited, which was isolated by filtration in 78 % yield after drying in air.

Then a mixture of methyl 3,5-bis(pyridin-4-ylmethoxy)benzoate (18 mmol, 6.55 g) and sodium hydroxide (100 mmol, 4.00 g) in water (80 ml) was stirred at 100 °C for 6 h, and was cooled to room temperature. The mixture was adjusted to approximately pH 4.5 with dilute hydrochloric acid. A light yellow solid of L1 formed immediately, which was isolated by filtration in 65 % yield after drying in air.

$^1\text{H NMR}$  (DMSO, 500 MHz)  $\delta$ : 5.23 (s, 4H), 6.92 (s, 1H), 7.17 (d,  $J = 2$  Hz, 2H), 7.44 (d,  $J = 5$  Hz, 4H), 8.57 (m, 4H). Elemental analyses calcd (%) for  $\text{C}_{19}\text{H}_{16}\text{N}_2\text{O}_4$  (336.35): C, 67.84; H, 4.81; N, 8.33. Found C, 67.87; H, 4.79; N, 8.31. IR (KBr pellet,  $\text{cm}^{-1}$ ): 3422 (m), 3083 (w), 1714 (m), 1597 (s), 1444 (m), 1381 (m), 1330 (m), 1301 (s), 1243 (m), 1166 (s), 1059 (s), 801 (w), 769 (w).

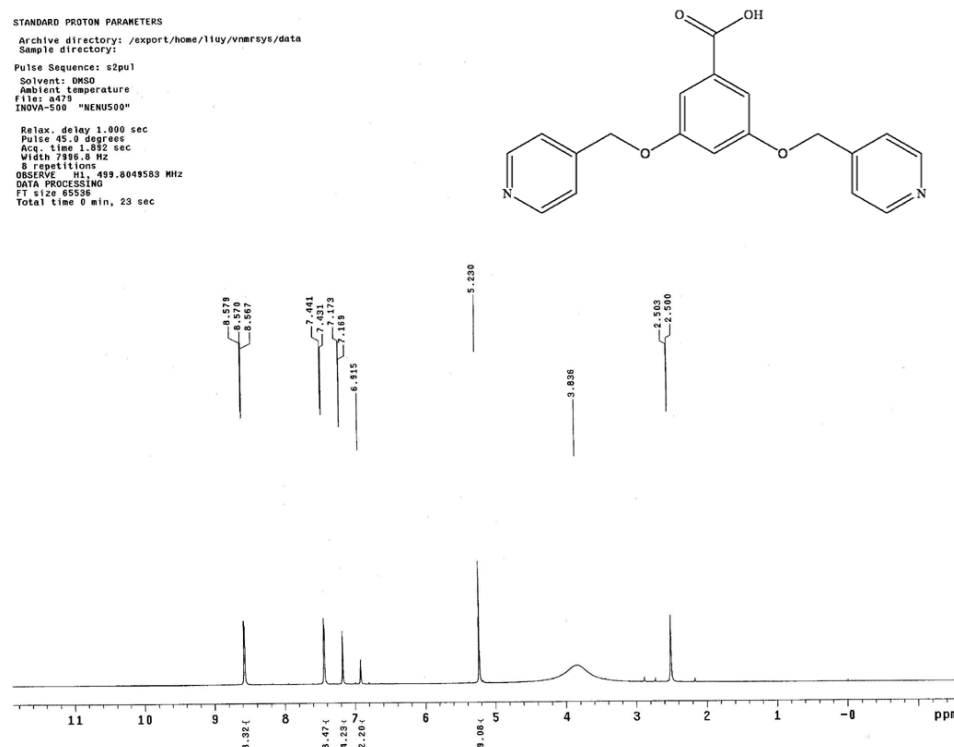

**Fig. S1**  $^1\text{H NMR}$  spectrum for L1 in DMSO.

### Synthesis of 3,4-bis(pyridin-4-ylmethoxy)benzoic acid (L2)

L2 was prepared in the same way as L1, by using methyl 3,4-dihydroxybenzoate instead of methyl 3,5-dihydroxybenzoate (62 % yield).

$^1\text{H}$  NMR (DMSO, 500 MHz)  $\delta$ : 5.22 (s, 1H), 5.30 (m, 3H), 7.13 (d,  $J = 8.5$  Hz, 1H), 7.46 (q,  $J = 5.5$  Hz, 5H), 7.55 (t,  $J = 6$  Hz, 1H), 8.58 (m, 4H). Elemental analyses calcd (%) for  $\text{C}_{19}\text{H}_{16}\text{N}_2\text{O}_4$  (336.35): C, 67.84; H, 4.81; N, 8.33. Found C, 67.86; H, 4.78; N, 8.34. IR (KBr pellet,  $\text{cm}^{-1}$ ): 3428 (m), 2928 (w), 1698 (s), 1601 (s), 1517 (m), 1381 (s), 1350 (s), 1274 (s), 1211 (s), 1124 (m), 1024 (m), 811 (w), 759 (w).

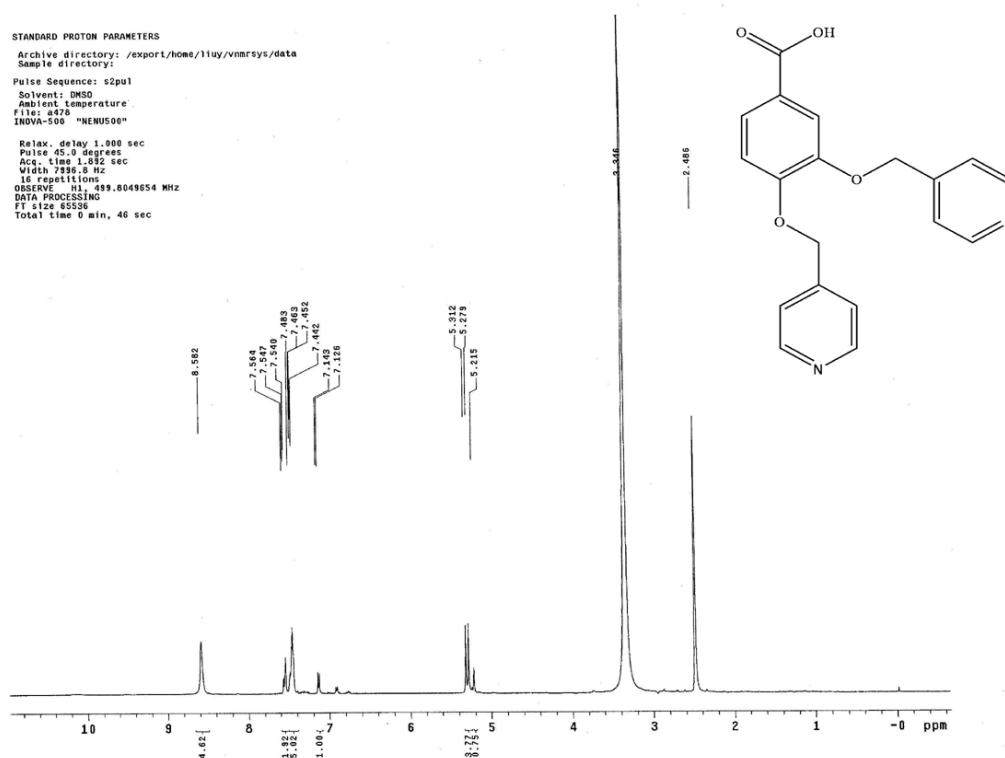

**Fig. S2**  $^1\text{H}$  NMR spectrum for L2 in DMSO.

### Synthesis of 3,5-bis(pyridin-3-ylmethoxy)benzoic acid (L3)

L3 was prepared in the same way as L1, by using 3-(chloromethyl)pyridine instead of 4-(chloromethyl)pyridine (60 % yield).

$^1\text{H}$  NMR (DMSO, 500 MHz)  $\delta$ : 5.19 (s, 4H), 6.94 (s, 1H), 7.19 (s, 2H), 7.43 (q,  $J = 2.5$  Hz, 2H), 7.87 (d,  $J = 7.5$  Hz, 2H), 8.55 (d,  $J = 2.5$  Hz, 2H), 8.67 (s, 2H). Elemental analyses calcd (%) for  $\text{C}_{19}\text{H}_{16}\text{N}_2\text{O}_4$  (336.35): C, 67.84; H, 4.81; N, 8.33. Found C, 67.86; H, 4.80; N, 8.35. IR (KBr pellet,  $\text{cm}^{-1}$ ): 3404 (m), 3094 (m), 1699 (m), 1599 (s), 1452 (m), 1352 (s), 1299 (s), 1258 (m), 1166 (s), 1046 (s), 791 (m), 704 (m).

STANDARD PROTON PARAMETERS  
Archive directory: /export/home/lluy/vnmrsys/data  
Sample directory:  
Pulse Sequence: s2pul  
Solvent: DMSO  
Ambient Temperature  
File: a073  
INDVA=500 "NEMUS00"  
Relax, delay 1.000 sec  
Pulse: 45.0 degrees  
Acq. time 1.832 sec  
Width 7386.8 Hz  
8 repetitions  
OBSERVE: H1, 499.5046586 MHz  
DATA PROCESSING  
F1 size 65536  
Total time 0 min, 23 sec

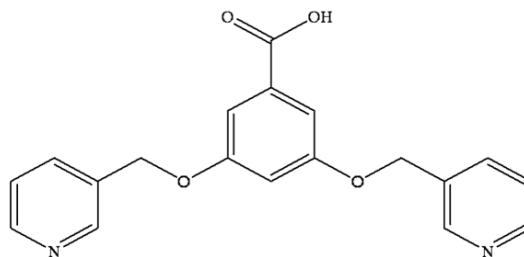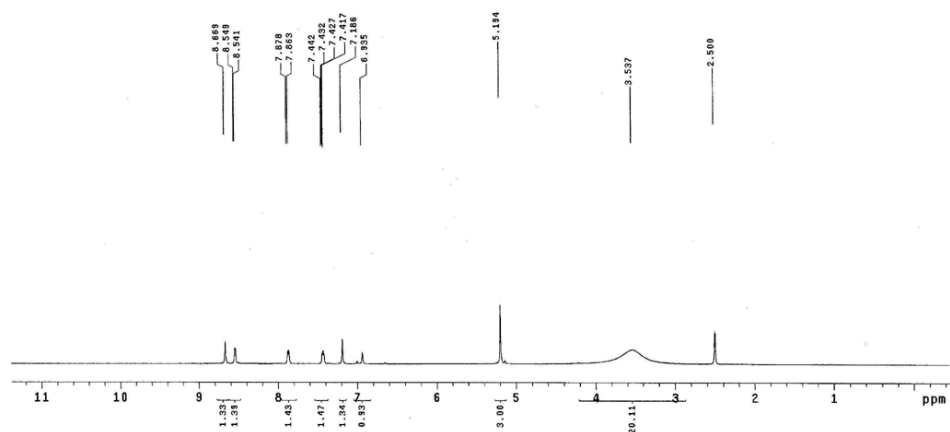

**Fig. S3** <sup>1</sup>H NMR spectrum for L3 in DMSO.

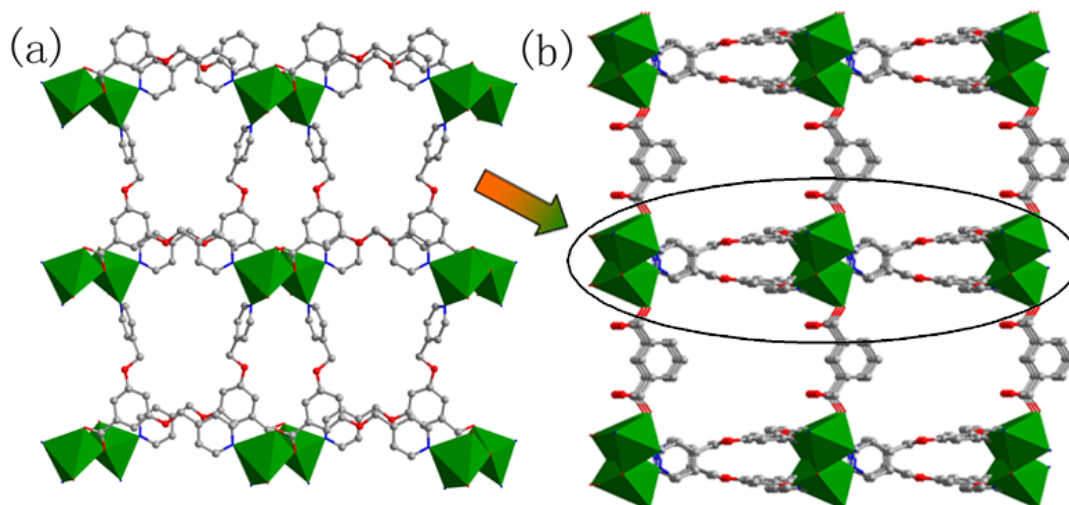

**Fig. S4** Polyhedral representations of 1 (a) 2D bilayer structure; (b) 3D framework structure.

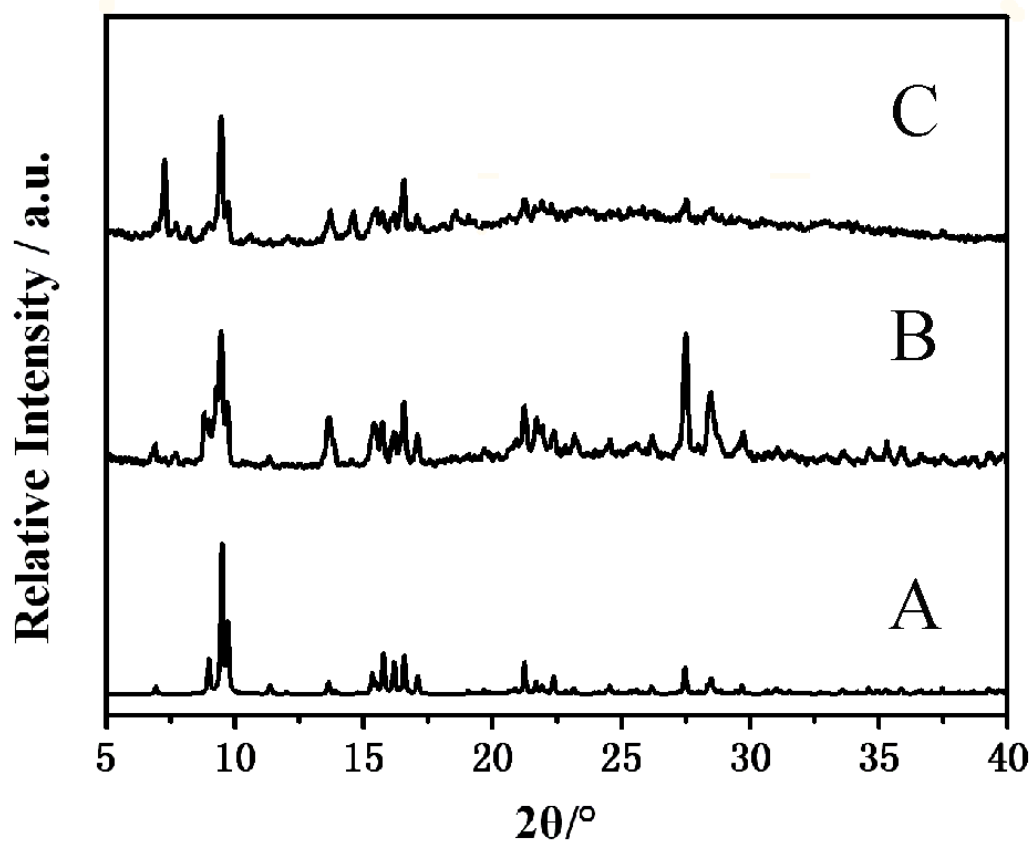

**Fig. S5** The XRPD patterns of **1** at different temperatures: (a) simulated; (b) as-synthesized at 25 °C; (c) after heating at 240 °C (the simulated patterns are generated from single crystal diffraction data).

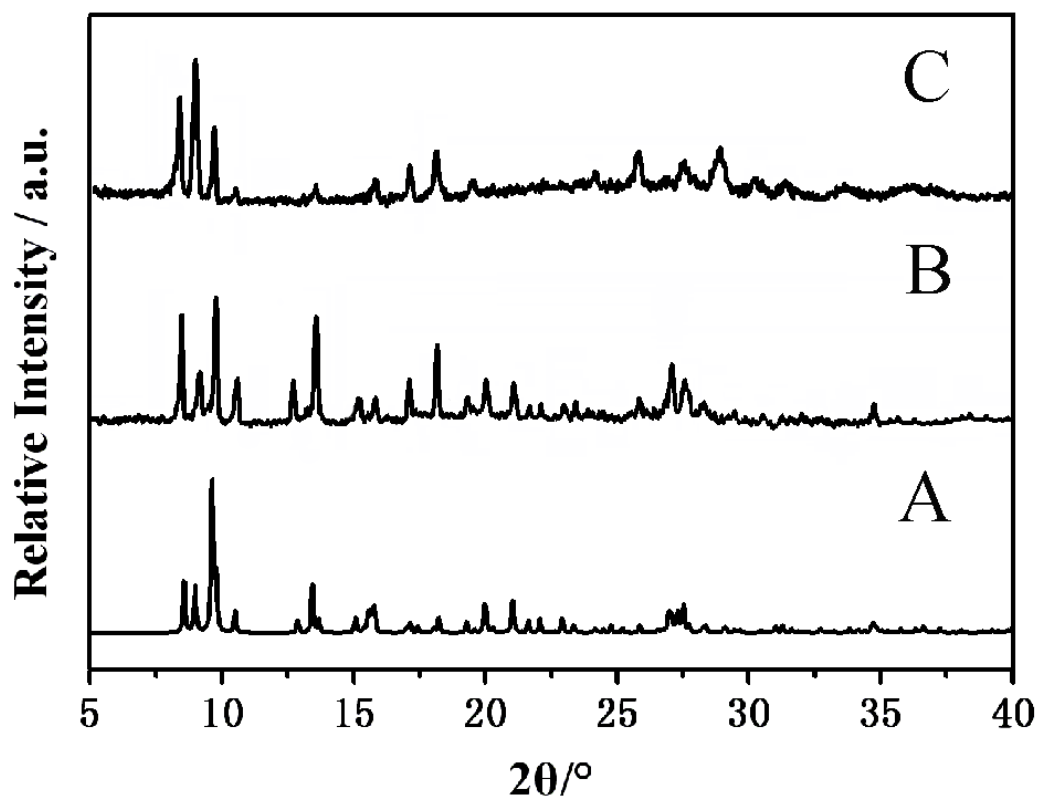

**Fig. S6** The XRPD patterns of **2** at different temperatures: (a) simulated; (b) as-synthesized at 25 °C; (c) after heating at 300 °C (the simulated patterns are generated from single crystal diffraction data).



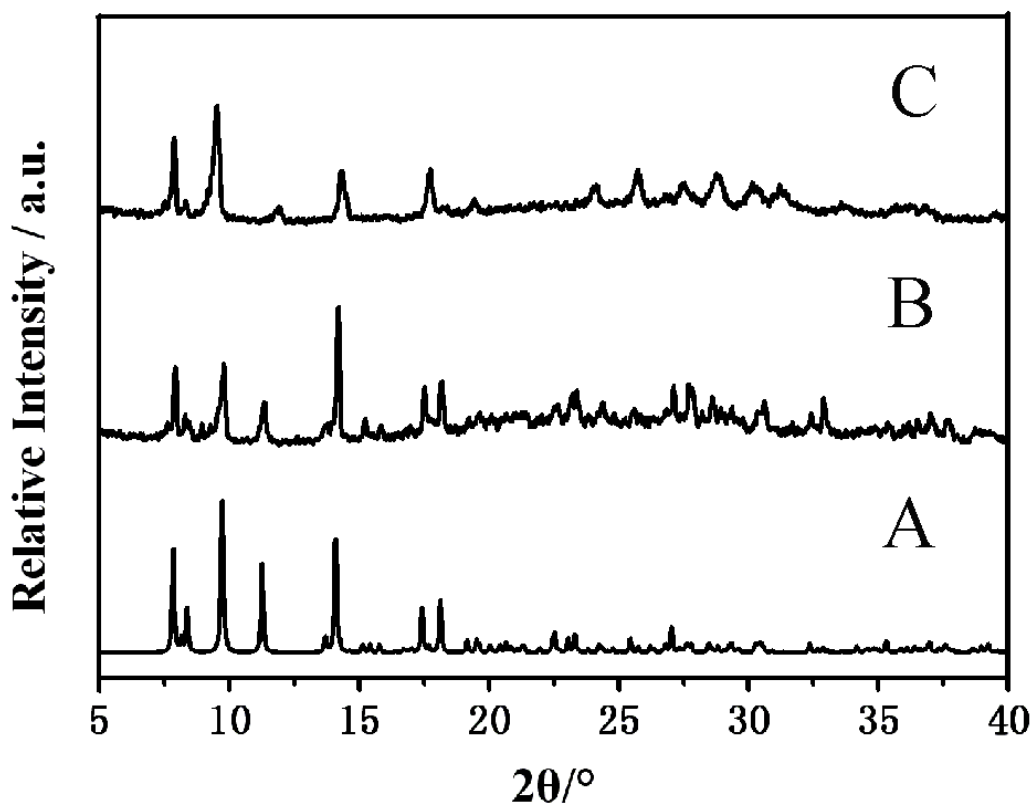

**Fig. S7** The XRPD patterns of **3** at different temperatures: (a) simulated; (b) as-synthesized at 25 °C; (c) after heating at 240 °C (the simulated patterns are generated from single crystal diffraction data).

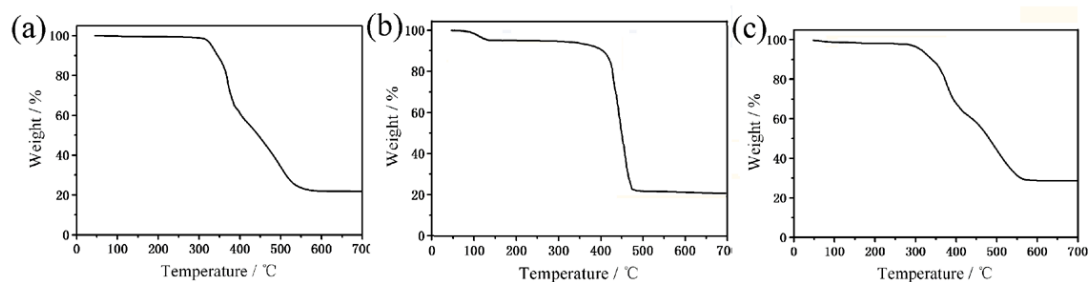

**Fig. S8** TG curves of (a) **1**, (b) **2** and (c) **3**.
